# Supplementary figures and images for: Comparative evaluation of the hepatotoxicity, phototoxicity and photosensitizing potential of dronedarone hydrochloride and its cyclodextrin-based inclusion complexes
Source: Royal Society of Chemistry journal article supplement (doi:10.1039/c8pp00559a), 2019-04-17

### Supplementary material

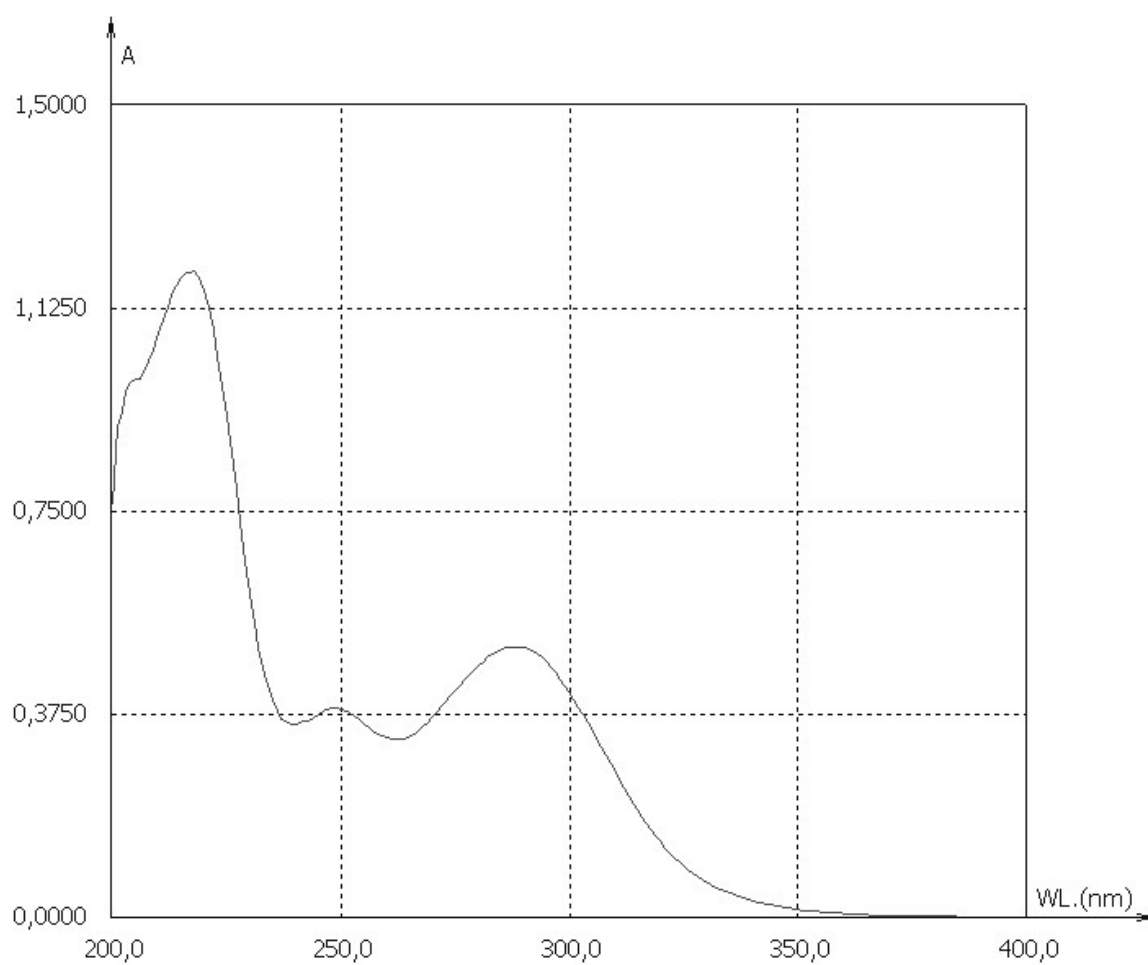

Fig. S1 - UV spectrum of DRO reference solution (15 µg/mL) in methanol.

Supplement: c8pp00559a1.pdf [file c8pp00559a1.pdf]
